# Supplementary material for: Identification of late assembly domains of the human endogenous retrovirus-K(HML-2)
Source: PubMed Central journal article supplement (PMC3874623; doi:10.1186/1742-4690-10-140), 2013-11-19
Supplement: 1742-4690-10-140-S1.pdf [file 1742-4690-10-140-S1.pdf]

Supplementary Table 1: Mutations introduced into HERV-K113 to generate oriHERV-K113. Nucleotides are numbered according to the sequence in GenBank AY037928. Amino acid numbering of Gag, Env and Rec starts with the initiation codon of the proteins.

| <b>no.</b> | <b>gene</b> | <b>nucleotide</b> | <b>amino acid</b> |
|------------|-------------|-------------------|-------------------|
| 1          | gag         | C1551T            | A147V             |
| 2          |             | A1622G            | M171V             |
| 3          |             | A1773G            | Q221R             |
| 4          |             | T1974C            | L288P             |
| 5          |             | G2659C            | M516I             |
| 6          | pro         | C3404T            | T to I            |
| 7          |             | A3613G            | S to G            |
| 8          |             | T3752C            | V to A            |
| 9          | pol         | C4433A            | D to E            |
| 10         |             | T4741C            | V to A            |
| 11         |             | A4812G            | T to A            |
| 12         |             | G4891A            | R to Q            |
| 13         |             | T4924C            | I to T            |
| 14         |             | T5320C            | L to P            |
| 15         |             | C6214T            | P to L            |
| 16         |             | G6425A            | M to I            |
| 17         | env         | A6823G            | I125V             |
| 18         |             | T6868C            | C140R             |
| 19         |             | C7234A            | L262I             |
| 20         |             | G7417C            | A323P             |
| 21         |             | T7968A            | N506K             |
| 22         |             | T8179C            | C577R             |
| 23         |             | A8326C            | T626P             |
| 24         | env / rec   | A8414G            | Y655C / T89A      |
| 25         | rec         | C8437A            | D96E              |
| 26         | 3'LTR       | T8588C            |                   |
| 27         |             | A8799G            |                   |
| 28         |             | T9133C            |                   |
